# Supplementary material for: Co-Based Nanosheets with Transitional Metal Doping for Oxygen Evolution Reaction
Source: MDPI journal article supplement (doi:10.3390/nano12111788), 2022-05-24
Supplement: s1 [file s1]

## Supplementary Materials

# Co-Based Nanosheets with Transitional Metal Doping for Oxygen Evolution Reaction

Chunhua Xiong<sup>1</sup> and Chao Cai<sup>2,\*</sup>

<sup>1</sup> College of Air Traffic Management, Civil Aviation Flight University of China, Guanghan 618307, China; xch@cafuc.edu.cn

<sup>2</sup> School of Physics, University of Electronic Science and Technology of China, Chengdu 610054, China

\* Correspondence: zchaotsai@163.com

### *Chemicals*

VCl<sub>4</sub> (>98 %), MnSO<sub>4</sub> (>98 %), Fe(NO<sub>3</sub>)<sub>3</sub>·6H<sub>2</sub>O (>98 %), Co(NO<sub>3</sub>)<sub>2</sub>·6H<sub>2</sub>O (>98 %), Ni(NO<sub>3</sub>)<sub>2</sub>·6H<sub>2</sub>O (>98 %), CuCl<sub>2</sub>·2H<sub>2</sub>O (>97 %), ZnSO<sub>4</sub> (>98 %), Sodium borohydride (SB) (>98 %), CTAB (>95 %), ethanol (>99 %), acetone (>97 %), potassium hydroxide (99.999 %), and isopropanol (>99 %) are purchased from Aladdin in Shanghai, China. Nafion solution (4.5 wt. %) is purchased from sigma, which is provided by The Chemours Company FC, LLC. Deionized water is 18.2 Ω/cm.

### *Synthesis of CoO<sub>x</sub> ANSs*

In air, 0.4 mmol Co(NO<sub>3</sub>)<sub>2</sub>·6H<sub>2</sub>O and 1 mmol CTAB are dissolved into 20 mL water with stirring speed of 600 rpm, forming pink solution. Then 10 mL NaOH solution (0.5 M) and 10 mL SB solution (0.1 mM) are added into pink solution quickly at room temperature. After further stirring of 30 min, the green products are washed 2 times by water and 3 times by ethanol/acetone (1:1) to remove surfactant, dried in air at 80 °C for 1 day.

### *Synthesis of MCoO<sub>x</sub> ANSs*

The preparation and wash processes of  $\text{MCoO}_x$  ANSs are similar to the  $\text{CoO}_x$  ANSs with extra metal salt added into pink solution ( $\text{M/Co}=1:1$ ). The Fe/Co ratio is controlled via change the feed amount of  $\text{Fe}(\text{NO}_3)_3 \cdot 6\text{H}_2\text{O}$ .

### ***Synthesis of $\text{NiO}_x$ ANSs***

The preparation and wash processes of  $\text{NiO}_x$  ANSs are similar to the  $\text{CoO}_x$  ANSs by adding 0.4 mmol  $\text{Ni}(\text{NO}_3)_2 \cdot 6\text{H}_2\text{O}$  instead.

***Crystal  $\text{Co}_3\text{O}_4$  NSs*** are prepared by annealing prepared  $\text{CoO}_x$  ANSs in air at 450 °C for 30 min with a heating rate of 10 °C/min.

**X-ray diffraction (XRD)** (Bruker ECO D8 power X-ray diffractometer with  $\text{Cu K}\alpha$  radiation) were utilized to determine the crystal structure of the samples.

The morphology and microstructure characterizations of the as-prepared samples were investigated by *scanning electron microscopy (SEM)* (FEI, Helios Nanolab 600i, 2kV), *Transmission electron microscopy (TEM)* and selected area electron diffraction (SAED) (FEI, ETEM, G2, 200kV), *scanning transmission electron microscopy with an energy dispersive X-ray spectroscopy attachment* (STEM-EDS, FEI Titan Themis, 300 kV).

**XPS** measurements were conducted on the Axis Ultra DLD multitechnique surface analysis system and relative curves were calculated by C1s (284.8 eV).

### ***Electrochemical characterization***

All the experiments are carried out in air at room temperature. Prepared samples loading on carbon with mass containing of 20 wt. %. Isopropanol, water and Nafion solution (volume ratio is 1:3:0.005) is used as solution for

preparing catalyst ink (2 mg/mL). Amount of ink is coated onto a polished glassy carbon electrode as working electrode, with catalyst loading of ca. 0.113 mg/cm<sup>2</sup>. In a three-electrode system, 1 M KOH is used as electrolyte, Ag/AgCl and graphite rod are used as reference electrode and counter electrode respectively. Before test, the working electrode is immersed into electrolyte for 2 h. Line scan voltammetry (0.002 V/s on a 1600 rpm RDE) is used to characterize the catalytic performance.  $C_{dl}$  is calculated from the difference between anodic and cathodic current density at 1.15 V *vs.* RHE (relative cyclic voltammetry is carried out from 1.1-1.2 V *vs.* RHE).

All the experimental equipment except TEM is located at the University of Electronic Science and Technology of China, Chengdu 610054, China. The TEM was conducted at Southern University of Science and Technology in Shenzhen 518000, China.

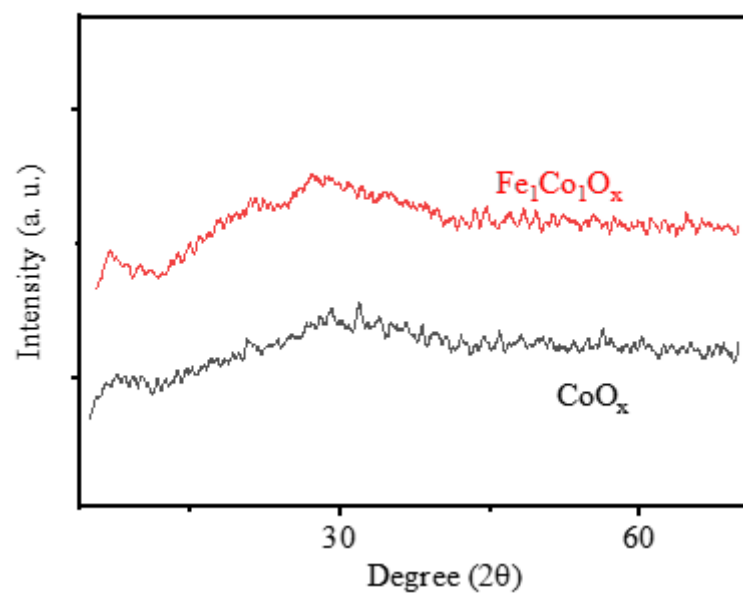

**Figure S1.** XRD pattern of as-prepared  $\text{CoO}_x$  and  $\text{Fe}_1\text{Co}_1\text{O}_x$  NSs.

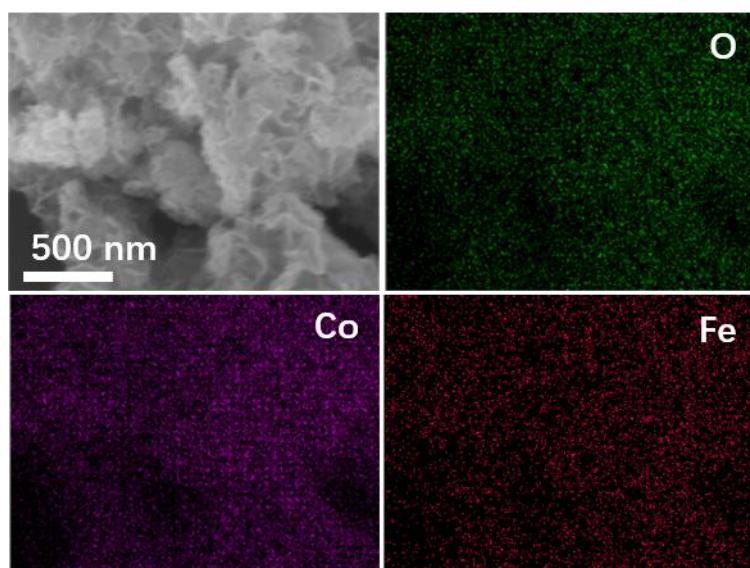

**Figure S2. EDS mapping of  $\text{Fe}_1\text{Co}_1\text{O}_x$  ANSs in SEM modes.**

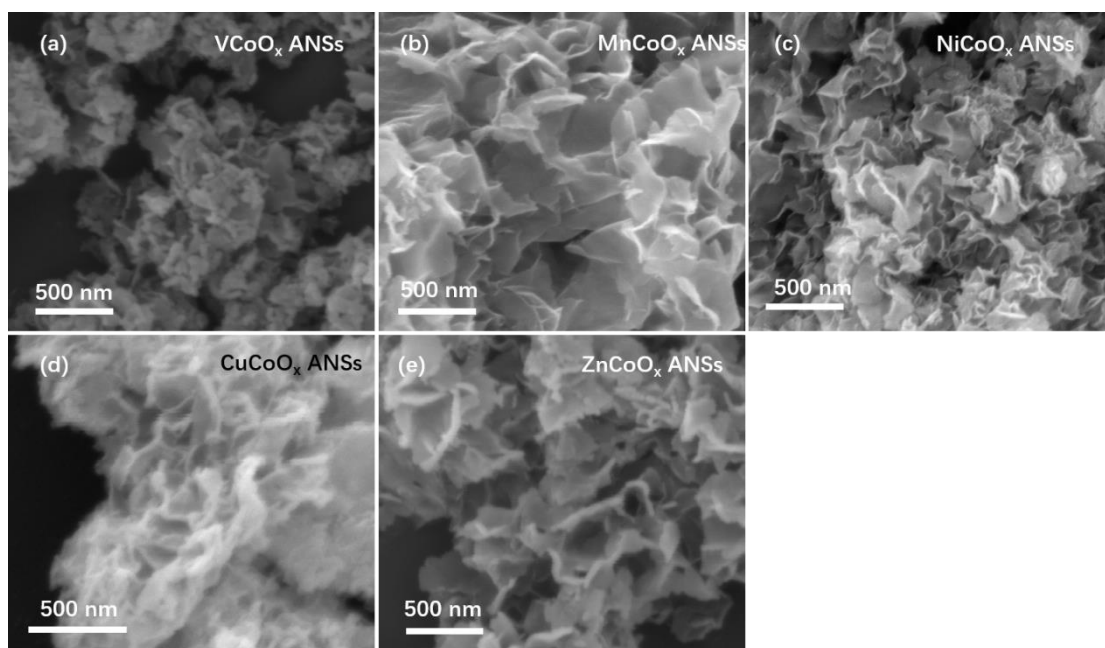

**Figure S3. SEM images of MCoO<sub>x</sub> NSs.** These NSs are based on Co, with M:Co molar ratio of 1:1 in solution. All the acquired materials possess sheet-like feature.

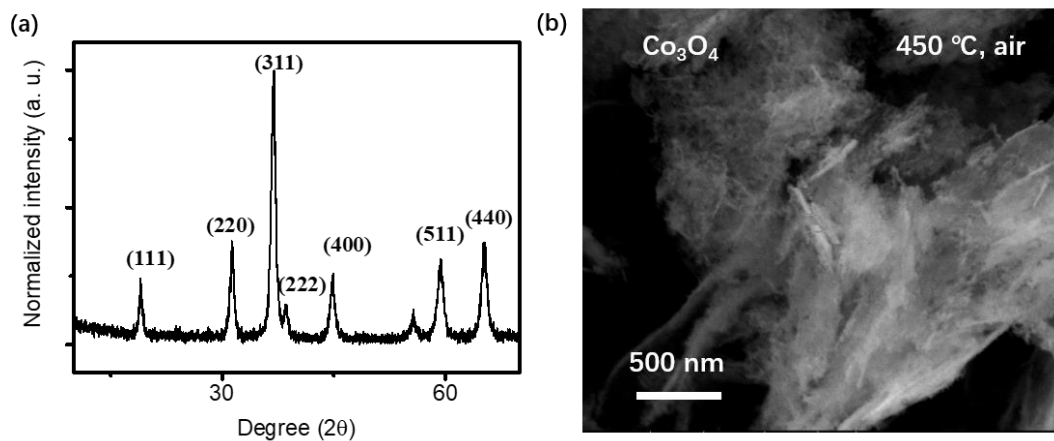

**Figure S4. XRD pattern and SEM image of  $\text{Co}_3\text{O}_4$  NSs.** The materials after annealing possess good crystalline, in line with JCPDS #42-1467. Because of the thermal relaxation, the annealed  $\text{Co}_3\text{O}_4$  NSs shows good crystalline. SEM image clarifies the 2D feature of  $\text{Co}_3\text{O}_4$  NSs (Figure S4b).

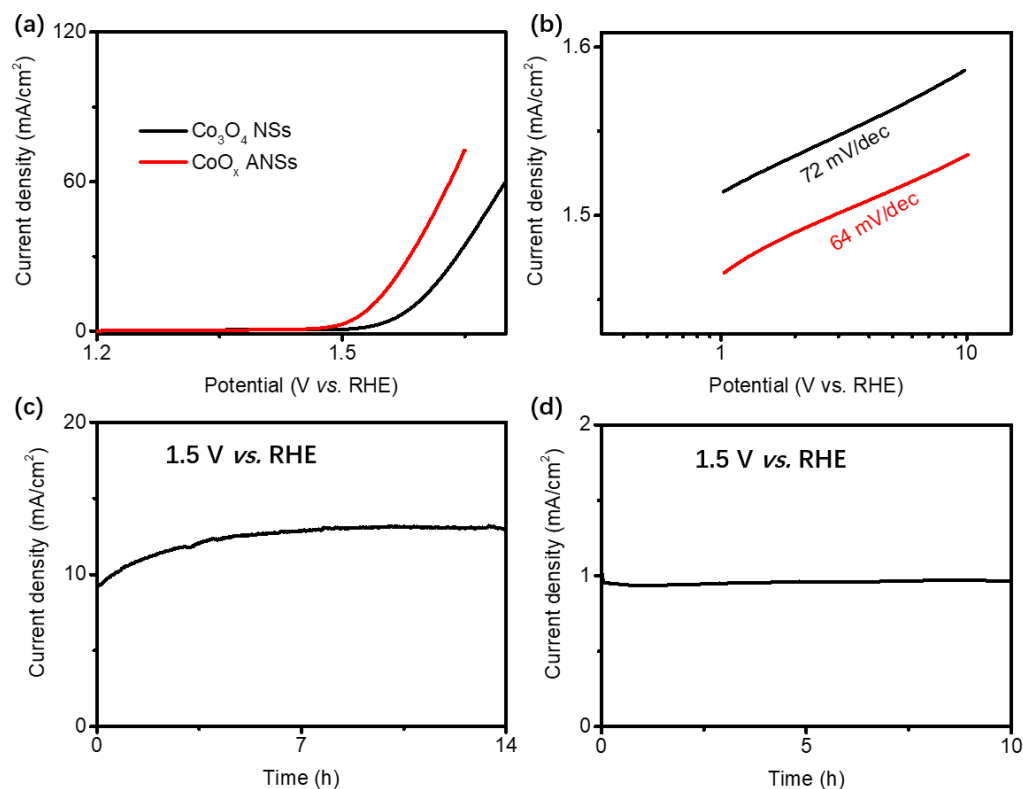

**Figure S5. Electrochemical characterization of  $\text{CoO}_x$  ANSs and  $\text{Co}_3\text{O}_4$  NSs.**

Polarization curves (a), Tafel slopes (b), stability test of  $\text{CoO}$  ANSs (c), and stability test of  $\text{Co}_3\text{O}_4$  NSs (d).

$\text{CoO}_x$  ANSs show higher OER activity, which is ca. 3.6-fold of  $\text{Co}_3\text{O}_4$  NSs [calculated from specific current density at 1.5 V *vs.* RHE].  $\text{CoO}_x$  ANSs also have lower Tafel slope (64 mV/dec) than  $\text{Co}_3\text{O}_4$  NSs (72 mV/dec). Both  $\text{Co}_3\text{O}_4$  NSs and  $\text{CoO}_x$  ANSs show good stability in OER at 1.5 V *vs.* RHE, indicating the priority of 2D feature of  $\text{CoO}$ -based materials for efficient OER catalysts.



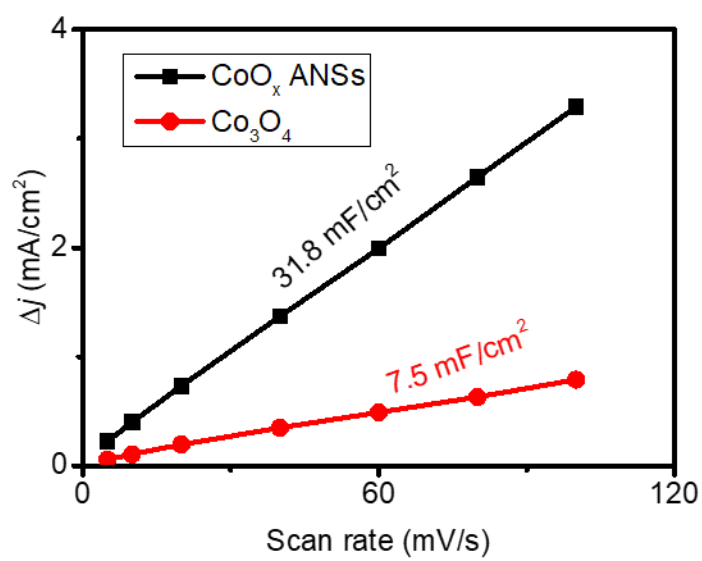

**Figure S6. ECSA of CoO<sub>x</sub> ANSs and Co<sub>3</sub>O<sub>4</sub> NSs.**  $C_{dl}$  is tested from 1.15 V *vs.* RHE.

**Table S1. Parameter of electrocatalysts for OER in 1 M KOH.**

| Sample                                                | Tafel slope<br>(mV/dec) | Overpotential at 10<br>mA/cm <sup>2</sup> (mV) | Mass activity at<br>1.5 V <i>vs.</i> RHE<br>(A/g) |
|-------------------------------------------------------|-------------------------|------------------------------------------------|---------------------------------------------------|
| Co <sub>3</sub> O <sub>4</sub> NSs                    | 72                      | 357                                            | 8.2                                               |
| CoO <sub>x</sub> ANSs                                 | 64                      | 307                                            | 25.6                                              |
| VCoO <sub>x</sub> ANSs                                | 63                      | 300                                            | 35.3                                              |
| MnCoO <sub>x</sub> ANSs                               | 67                      | 286                                            | 49.4                                              |
| <b>Fe<sub>1</sub>Co<sub>1</sub>O<sub>x</sub> ANSs</b> | <b>50</b>               | <b>240</b>                                     | <b>353.0</b>                                      |
| NiCoO <sub>x</sub> ANSs                               | 51                      | 263                                            | 123.6                                             |
| CuCoO <sub>x</sub> ANSs                               | 51                      | 290                                            | 36.2                                              |
| ZnCoO <sub>x</sub> ANSs                               | 60                      | 308                                            | 19.4                                              |
| <b>Commercial IrO<sub>2</sub></b>                     | <b>70</b>               | <b>320</b>                                     | <b>18.5</b>                                       |
| Commercial IrO <sub>2</sub><br>in Ref. [1]            | 52                      | 330                                            | 27.5 @ 1.53 V <i>vs.</i><br>RHE                   |

MCoO<sub>x</sub> ANSs have the atomic ratio of M/Co=1:1.

**Table S2. Collection of reported Co-based electrocatalysts on glassy carbon electrode for OER in 1 M KOH.**

| Sample                            | Tafel slope<br>(mV/dec) | Overpotential at 10<br>mA/cm <sup>2</sup> (mV) | Mass<br>activity<br>(A/g) | Ref. |
|-----------------------------------|-------------------------|------------------------------------------------|---------------------------|------|
| CoOOH                             | 38                      | 300                                            | 66.6 @ 1.53 V<br>vs. RHE  | [1]  |
| CoSe <sub>2</sub>                 | 50                      | 430                                            | --                        | [2]  |
| Au@Co <sub>3</sub> O <sub>4</sub> | 60                      | 370                                            | --                        | [3]  |
| NiO/CoN                           | 35                      | 300                                            | 853 @ 1.596<br>V vs. RHE  | [4]  |
| NG-CoSe <sub>2</sub>              | 40                      | 366                                            | 63.5 @ 1.596<br>V vs. RHE | [5]  |
| CoFe LDH                          | 34                      | 264                                            | --                        | [6]  |
| CoNi-P                            | 52                      | 270                                            | --                        | [7]  |
| rGO@CoFe-Pi                       | 36                      | 300                                            | 160 @ 1.59 V<br>vs. RHE   | [8]  |
| CoNi-P                            | 84                      | 292                                            | 253 @ 1.59 V<br>vs. RHE   | [9]  |
| Co <sub>3</sub> O <sub>4</sub>    | 58                      | 367                                            | --                        | [10] |
| Ir@Co                             | 90                      | 273                                            | --                        | [11] |
| Co/Mo <sub>2</sub> C@CNTs         | 90                      | 356                                            | --                        | [12] |

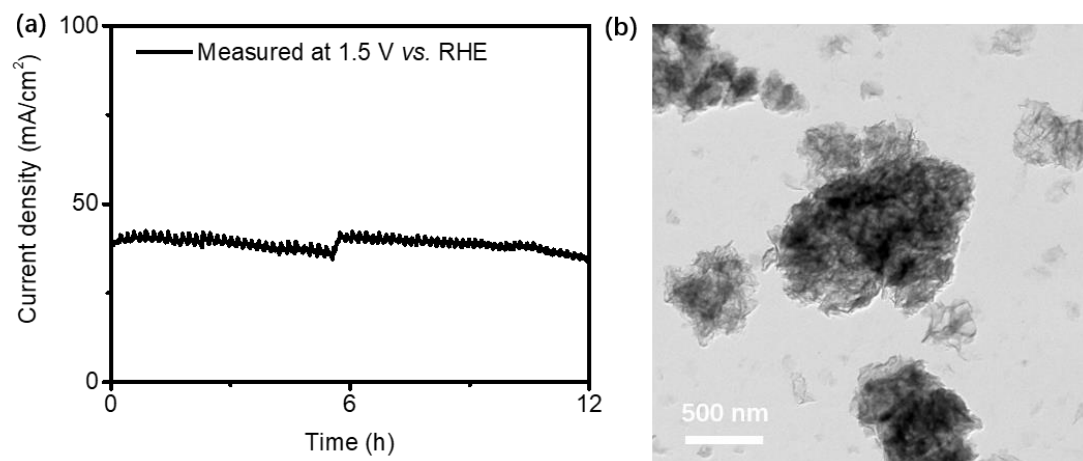

**Figure S7. Accelerating degradation of Fe<sub>1</sub>Co<sub>1</sub>O<sub>x</sub> ANSs in OER.** Stability test of Fe<sub>1</sub>Co<sub>1</sub>O<sub>x</sub> ANSs (a) and structure of FeCoO<sub>x</sub> ANSs after use (b) in alkaline solution. The collective electron transport (a) and sustained 2D feature (b) in OER demonstrate the high stability of FeCoO<sub>x</sub> ANSs for adapting long-time oxidizing condition.

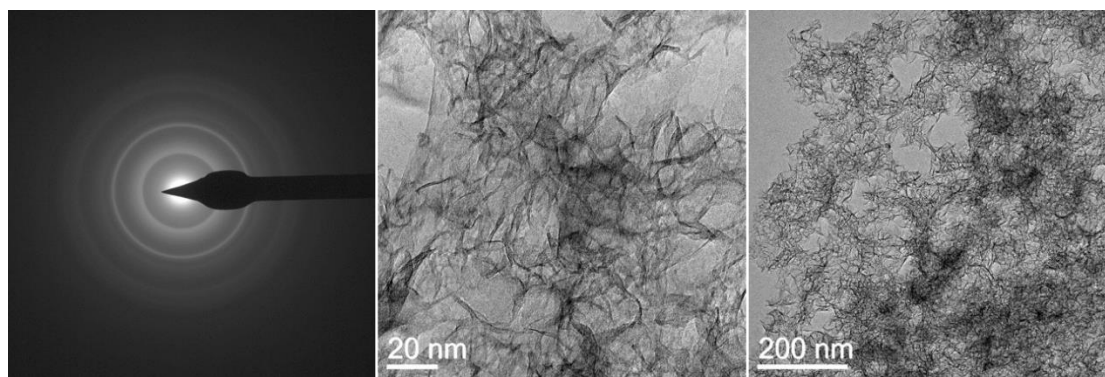

**Figure S8. SAED and TEM images of NiO<sub>x</sub> ANSs.** The NiO<sub>x</sub> ANSs also show ultrathin 2D feature. In contrast, the width of NiO<sub>x</sub> ANSs (ca. 200 nm) is much smaller than CoO<sub>x</sub> ANSs (> 1  $\mu\text{m}$ ).

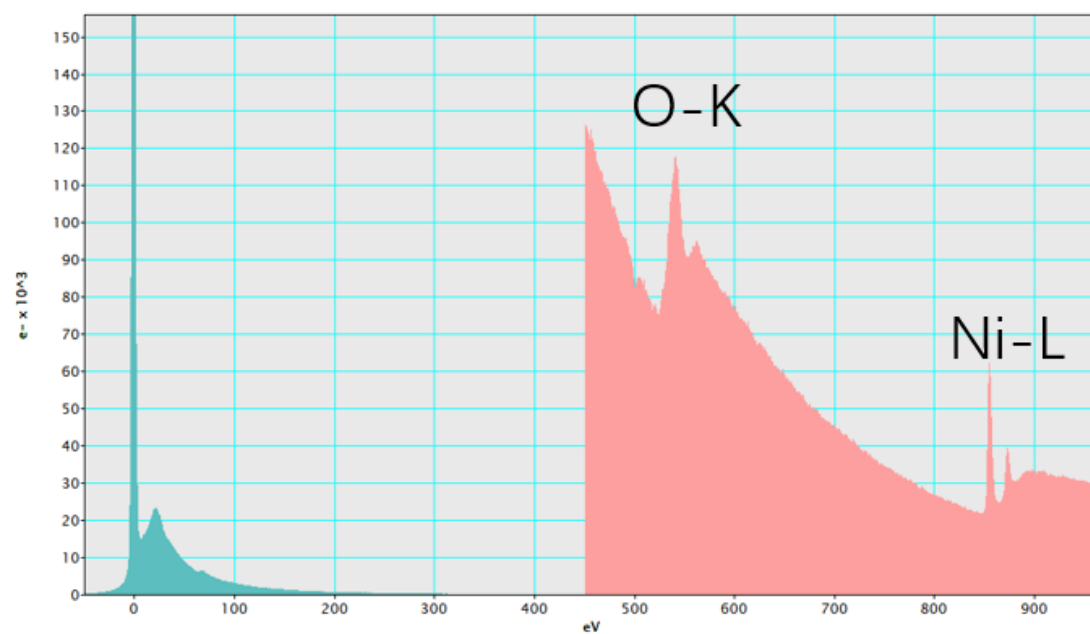

**Figure S9. EELS of NiO<sub>x</sub> ANSs.** The EELS spectrum demonstrates that the Ni-based NSs prepared in CTAB solution is composited by Ni and O.

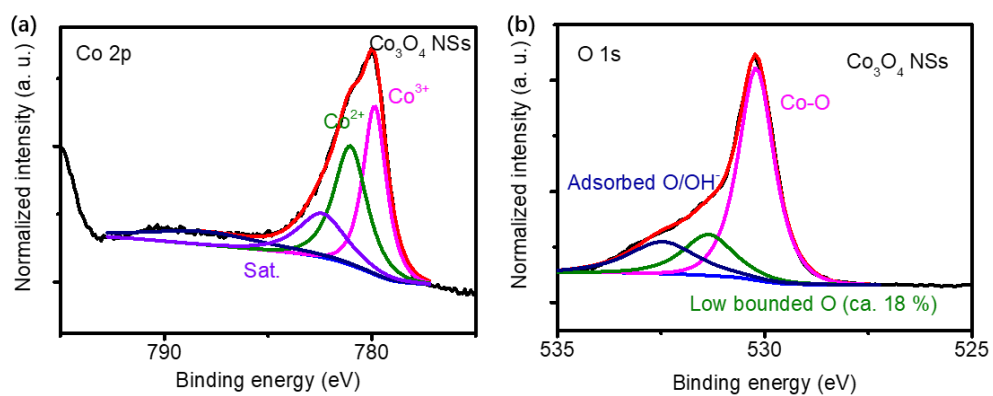

Figure S10. XPS spectrum of Co 2p and O1s of  $\text{Co}_3\text{O}_4$  NSs.

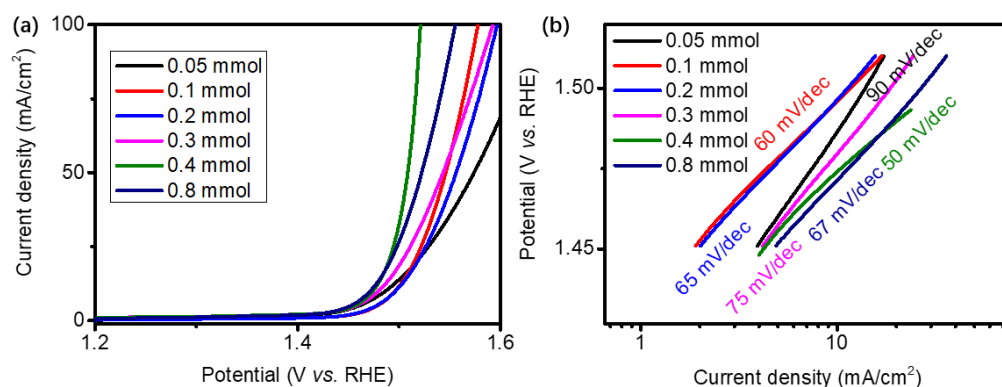

**Figure S11. Electrochemical test of  $\text{Fe}_x\text{Co}_{1-x}\text{O}_y$  ANSs with different Fe feeding in preparing step.** The Co feed amount in these materials is 0.4 mmol.

## References and Notes

1. Huang, J., Chen, J., Yao, T., He, J., Jiang, S., Sun, Z., Liu, Q., Cheng, W., Hu, F., Jiang, Y., Pan, Z. and Wei, S., CoOOH Nanosheets with High Mass Activity for Water Oxidation, *Angewandte Chemie*, **2015**, 54, 8722-8727.
2. Kwak, I. H., Im, H. S., Jang, D. M., Kim, Y. W., Park, K., Lim, Y. R., Cha, E. H. and Park, J., CoSe(2) and NiSe(2) Nanocrystals as Superior Bifunctional Catalysts for Electrochemical and Photoelectrochemical Water Splitting, *ACS applied materials & interfaces*, **2016**, 8, 5327-5334.
3. Zhuang, Z., Sheng, W. and Yan, Y., Synthesis of Monodispere Au@Co<sub>3</sub>O<sub>4</sub> Core-Shell Nanocrystals and Their Enhanced Catalytic Activity for Oxygen Evolution Reaction, *Advanced Materials*, **2014**, 26, 3950-3955.
4. Yin, J., Li, Y., Lv, F., Fan, Q., Zhao, Y.-Q., Zhang, Q., Wang, W., Cheng, F., Xi, P. and Guo, S., NiO/CoN Porous Nanowires as Efficient Bifunctional



Catalysts for Zn-Air Batteries, *ACS nano*, **2017**, *11*, 2275-2283.

5. Gao, M. R., Cao, X., Gao, Q., Xu, Y. F., Zheng, Y. R., Jiang, J. and Yu, S. H., Nitrogen-doped graphene supported CoSe(2) nanobelt composite catalyst for efficient water oxidation, *ACS nano*, **2014**, *8*, 3970-3978.
6. Liu, Y., Jin, Z., Li, P., Tian, X., Chen, X. and Xiao, D., Boron- and Iron-Incorporated doped gr Ultrathin Nanosheets as an Efficient Oxygen Evolution Catalyst, *ChemElectroChem*, **2018**, *5*, 593-597.
7. Xiao, X., He, C.-T., Zhao, S., Li, J., Lin, W., Yuan, Z., Zhang, Q., Wang, S., Dai, L. and Yu, D., A general approach to cobalt-based homobimetallic phosphide ultrathin nanosheets for highly efficient oxygen evolution in alkaline media, *Energy & Environmental Science*, **2017**, *10*, 893-899.
8. Li, J., Zhou, Q., Zhong, C., Li, S., Shen, Z., Pu, J., Liu, J., Zhou, Y., Zhang, H. and Ma, H., (Co/Fe)<sub>4</sub>O<sub>4</sub> Cubane-Containing Nanorings Fabricated by Phosphorylating Cobalt Ferrite for Highly Efficient Oxygen Evolution Reaction, *ACS Catalysis*, **2019**, *9*, 3878-3887.
9. Li, G. L., Zhang, X. B., Zhang, H., Liao, C. Y. and Jiang, G. B., Bottom-up MOF-intermediated synthesis of 3D hierarchical flower-like cobalt-based homobimetallic phosphide composed of ultrathin nanosheets for highly efficient oxygen evolution reaction, *Applied Catalysis B-Environmental*, **2019**, *249*, 147-154.
10. Tan, P., Wu, Z., Chen, B., Xu, H. R., Cai, W. Z. and Ni, M., Exploring oxygen electrocatalytic activity and pseudocapacitive behavior of Co<sub>3</sub>O<sub>4</sub> nanoplates in

alkaline solutions, *Electrochimica Acta*, **2019**, 310, 86-95.

11. Babu, D. D., Huang, Y., Anandhababu, G., Wang, X., Si, R., Wu, M., Li, Q., Wang, Y. and Yao, J., Atomic iridium@cobalt nanosheets for dinuclear tandem water oxidation, *Journal of Materials Chemistry A*, **2019**, 7, 8376-8383.

12. Ouyang, T., Ye, Y. Q., Wu, C. Y., Xiao, K. and Liu, Z. Q., Heterostructures Composed of N-Doped Carbon Nanotubes Encapsulating Cobalt and beta-Mo<sub>2</sub>C Nanoparticles as Bifunctional Electrodes for Water Splitting, *Angewandte Chemie*, **2019**, 58, 4923-4928.
